# Supplementary material for: Adenovirus infection is associated with altered gut microbial communities in a non-human primate
Source: PubMed Central journal article supplement (PMC6746978; doi:10.1038/s41598-019-49829-z), 2019-09-16
Supplement: 41598_2019_49829_MOESM1_ESM.pdf [file 41598_2019_49829_MOESM1_ESM.pdf]

## **Supplementary information**

### **Adenovirus infection is associated with altered gut microbial communities in a non-human primate**

Wasimuddin, Victor M. Corman, Jörg U. Ganzhorn, Jacques Rakotondranary, Yedidya R. Ratovonamana, Christian Drosten, Simone Sommer

# Supplementary Figure 1

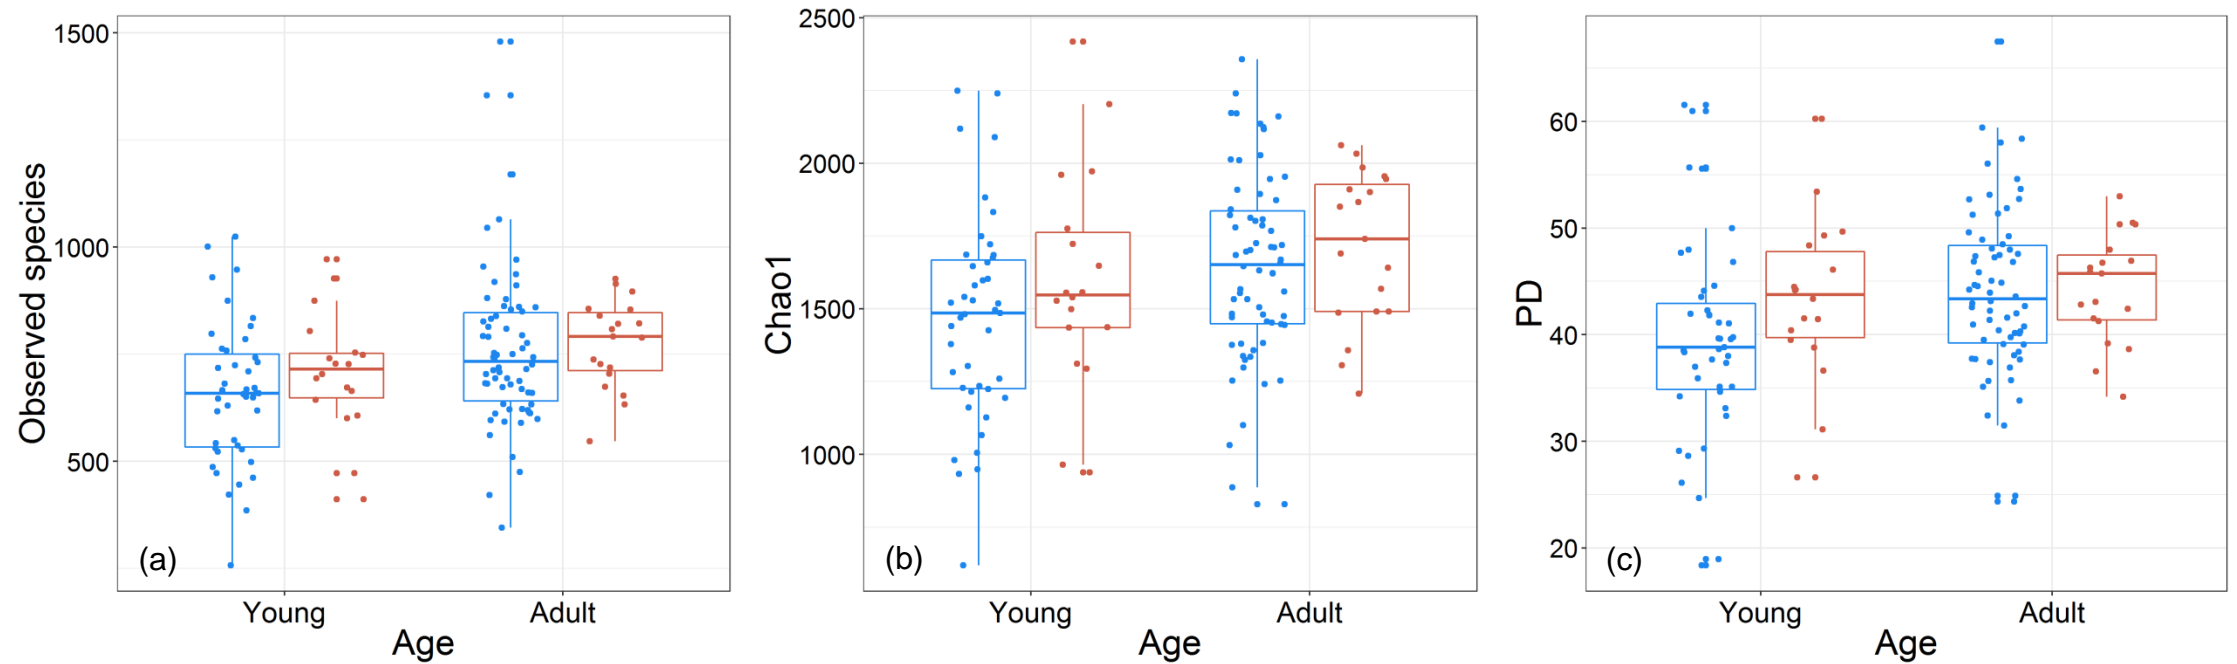

**Supplementary Figure 1. Gut bacterial alpha diversity according to AdV infection and age in mouse lemurs.** Shown is the effect of AdV infection (blue; AdV-, red; AdV+) and age on (a) Number of observed species ( $p=0.722$ ), ( $p=0.002$ ), (b) Chao1 ( $p=0.465$ ), ( $p=0.007$ ) and (c) PD ( $p=0.880$ ), ( $p=0.003$ ) on mouse lemur individuals, respectively (see Supplementary Table 1 for details).

## Supplementary Figure 2

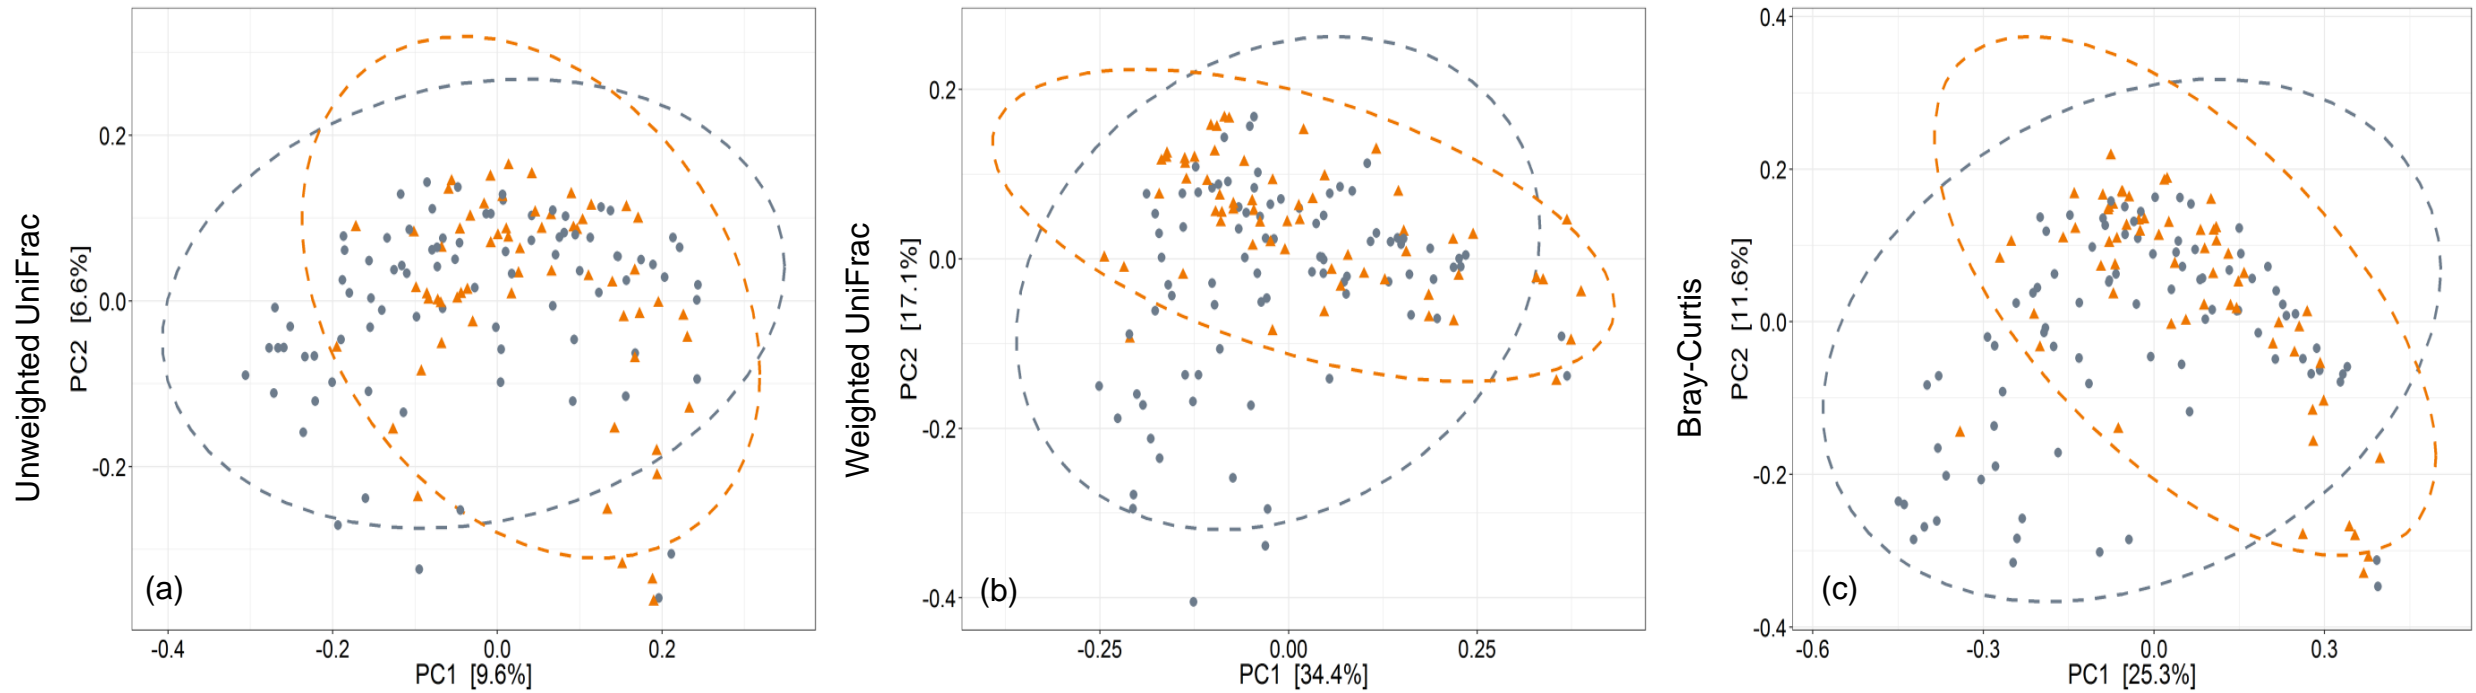

**Supplementary Figure 2. Gut bacterial community composition of mouse lemurs according to age.** Principal-coordinate plots based on (a) unweighted UniFrac ( $p=0.001$ ), (b) weighted UniFrac ( $p=0.005$ ) and (c) Bray-Curtis ( $p=0.001$ ) metrics of gut bacterial communities of mouse lemurs according to age. Dots/triangles and surrounding dashed ellipses (95% confidence level) represent gut bacterial communities of young (orange) and adults (grey).

### Supplementary Figure 3

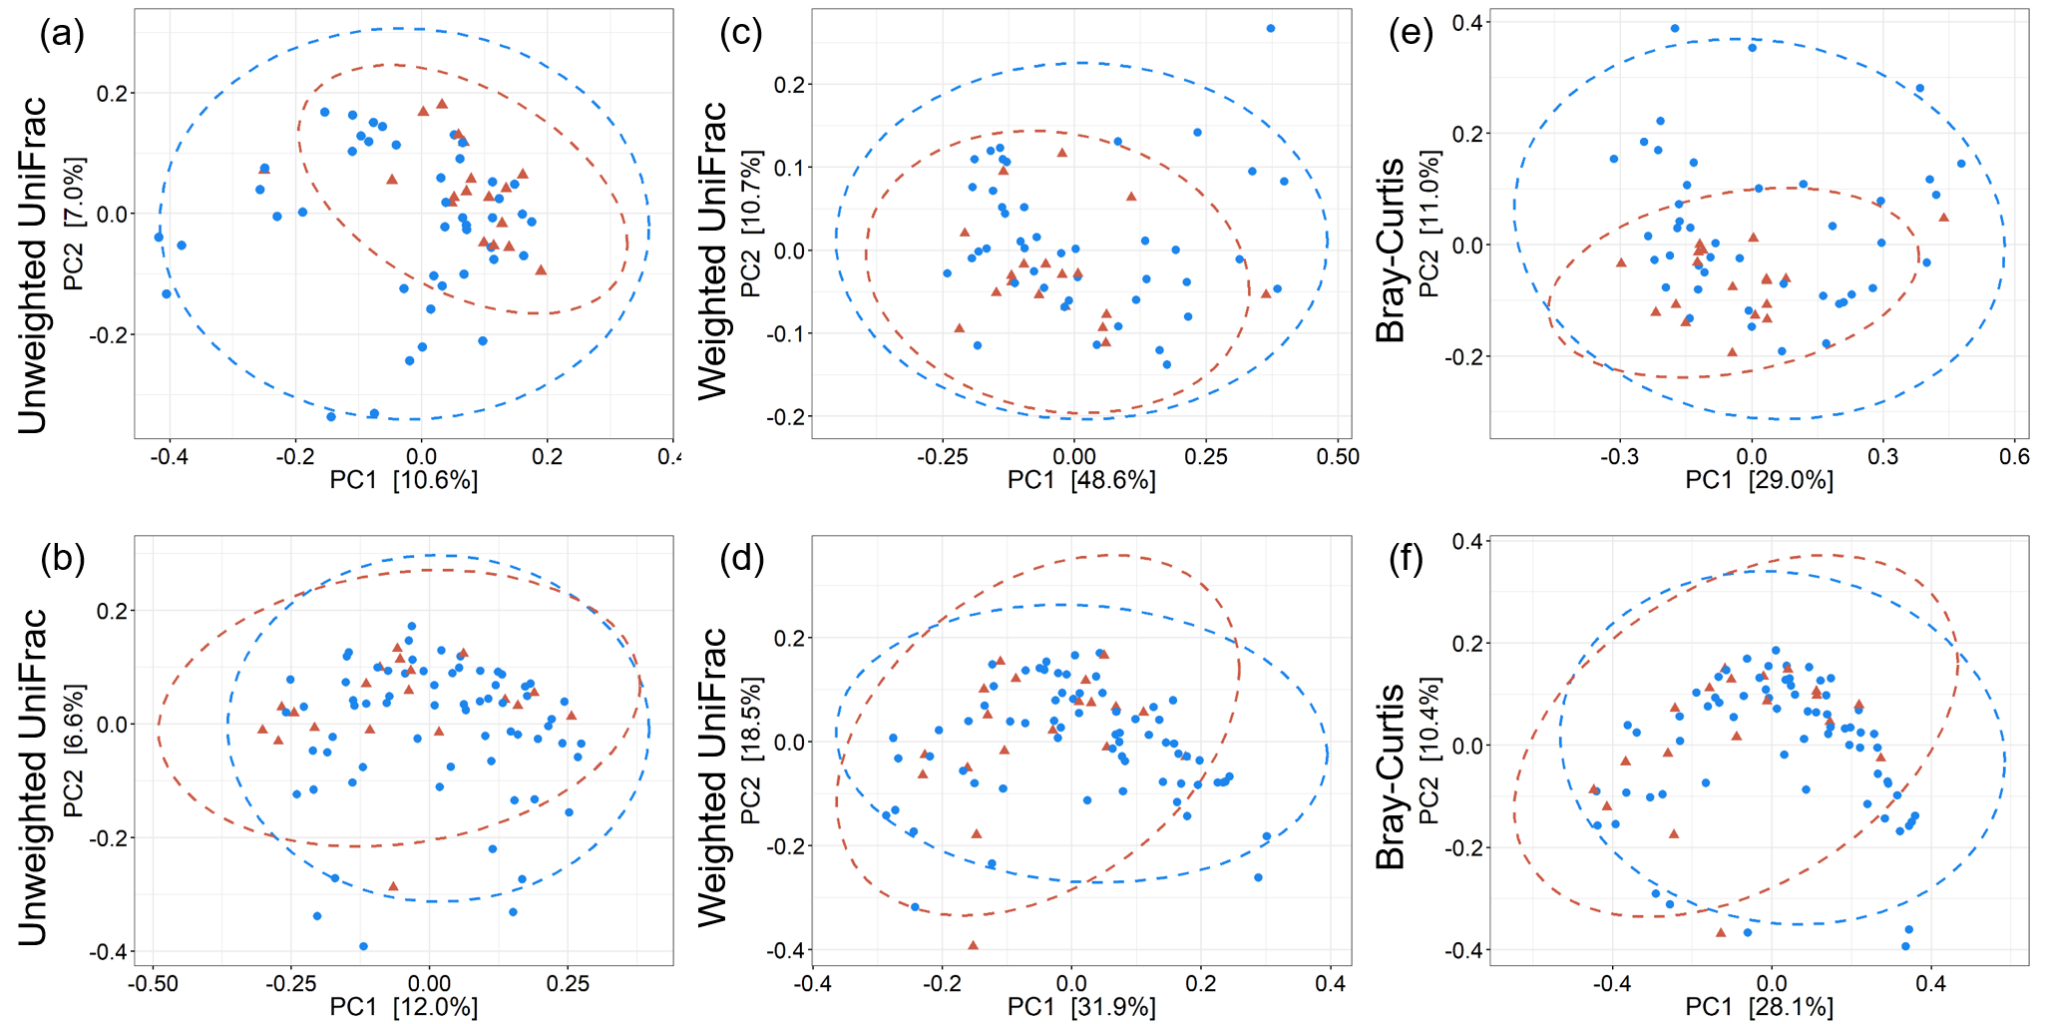

**Supplementary Figure 3. Gut bacterial community compositions according to AdV infection in young and adult mouse lemurs.**

Principal-coordinate plots based on (a, b) unweighted UniFrac (AdV\*Age,  $p=0.172$ ), (c, d) weighted UniFrac (AdV\*Age,  $p=0.704$ ) and (e, f) Bray-Curtis (AdV\*Age,  $p=0.282$ ) metrics of gut bacterial communities of young (a, c, e) and adult (b, d, e) mouse lemurs. Dots/triangles and surrounding dashed ellipses (95% confidence level) represent gut bacterial communities of AdV- (blue) and AdV+ (red) individuals.

## Supplementary Figure 4

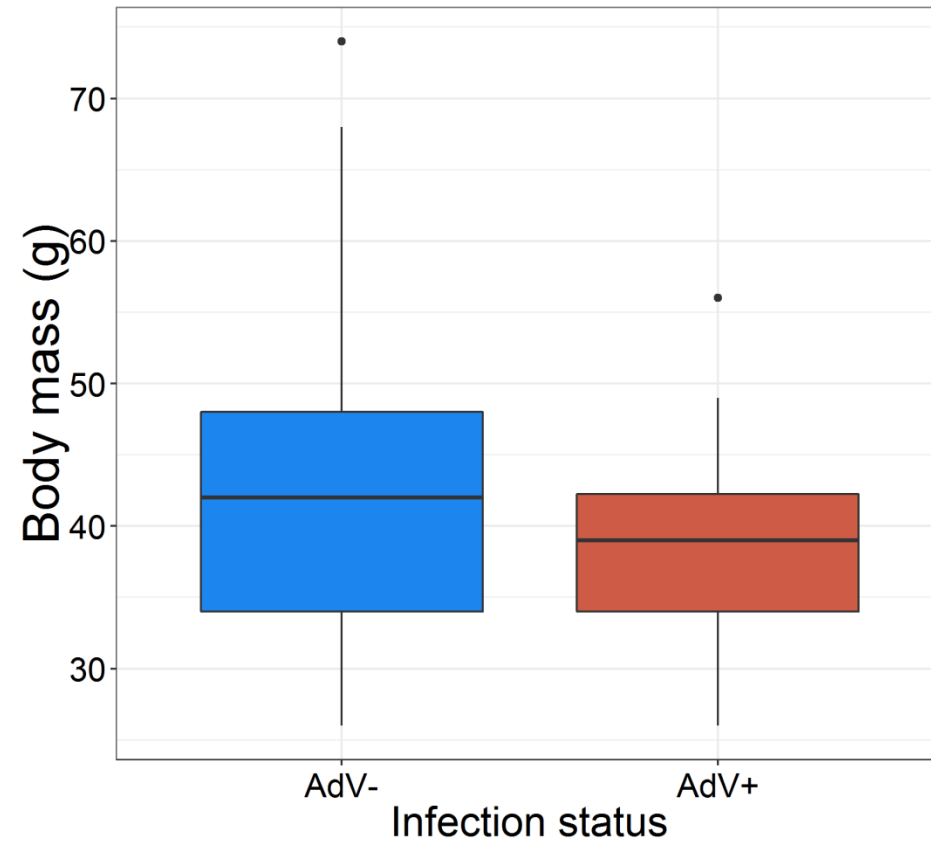

**Supplementary Figure 4. Average body mass of AdV- and AdV+ mouse lemurs.** The average body mass (in gram) of AdV+ individuals tended to be lower than of AdV- individuals ( $p=0.062$ ).

## Supplementary Figure 5

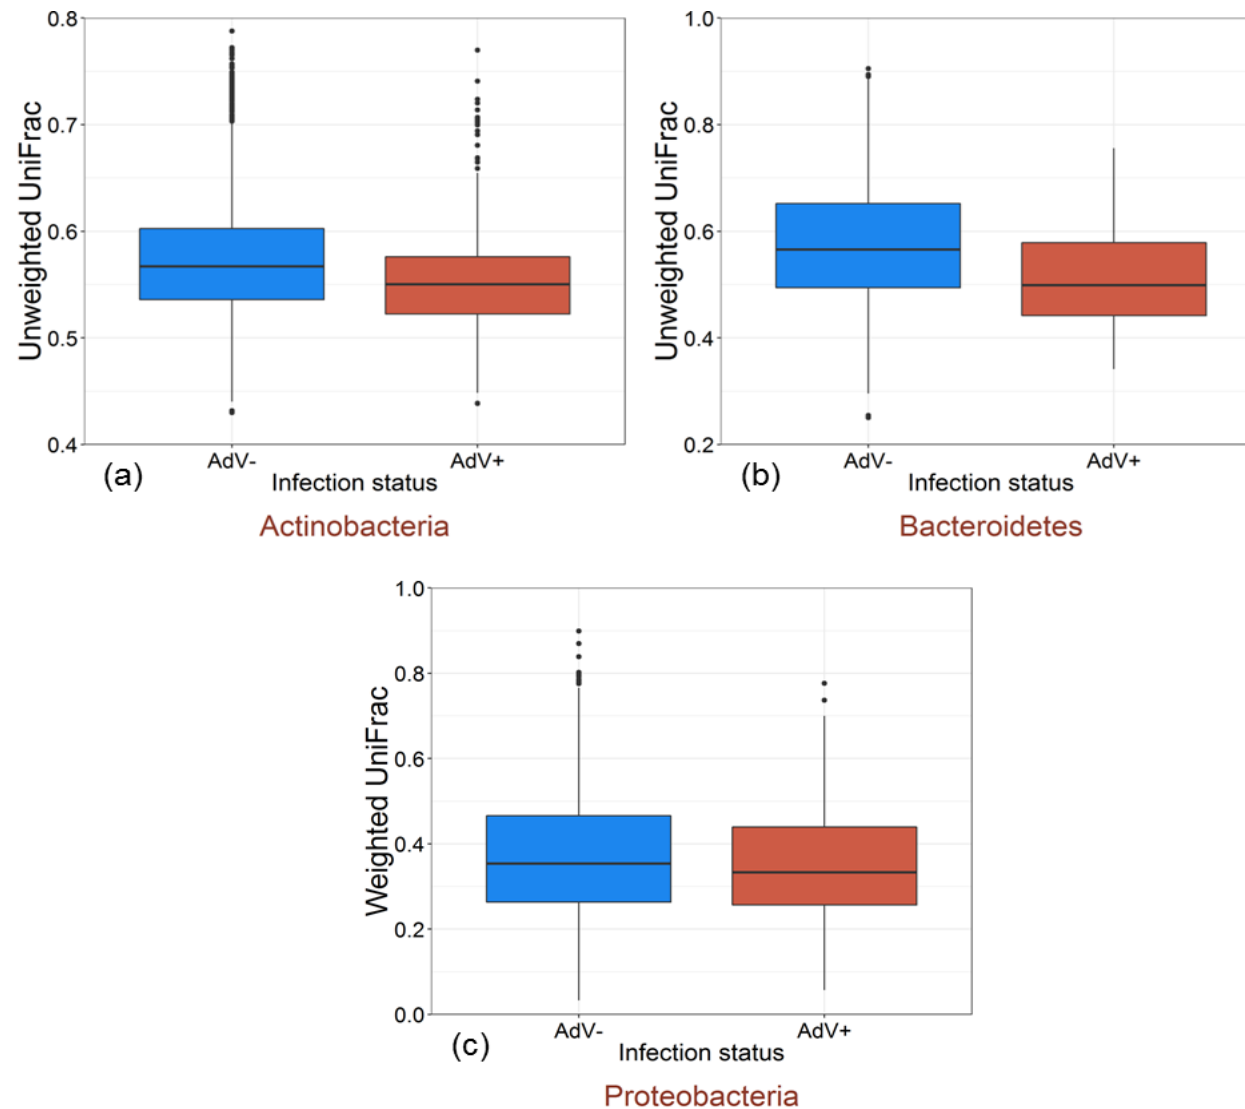

**Supplementary Figure 5. Beta diversity metrics of major phyla in relation to AdV infection in mouse lemurs.** Boxplots are showing unweighted UniFrac distances in (a) Actinobacteria (34.4% prevalence) ( $p=0.016$ ) and (b) Bacteroidetes (28.4% prevalence) ( $p=0.035$ ), and weighted UniFrac distances in (c) Proteobacteria (9.2% prevalence) ( $p=0.016$ ) in AdV- (blue) and AdV+ (red) mouse lemurs.

## Supplementary Figure 6

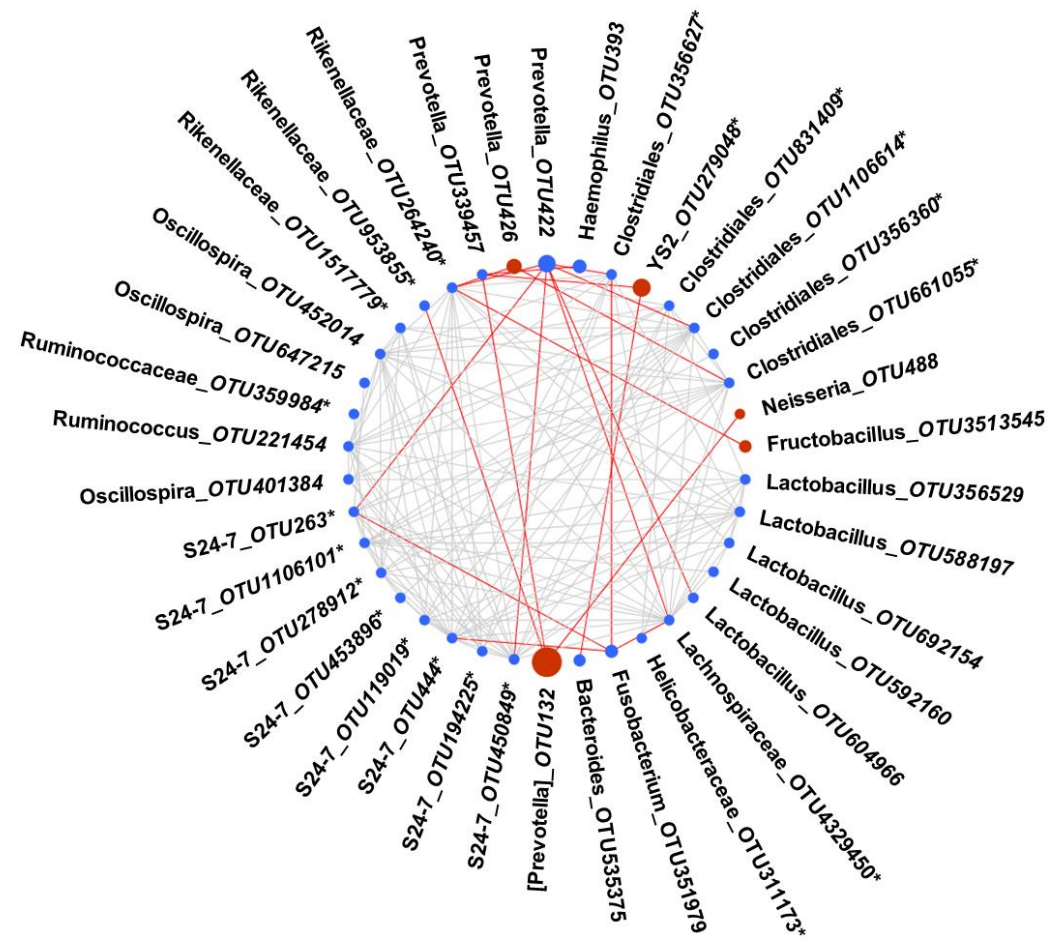

### Supplementary Figure 6. Microbial networks of OTUs differing in their relative abundance in relation to AdV-infection in mouse lemurs.

Shown is the network of mouse lemurs based on identified OTUs, differing in their relative abundance between AdV infected and uninfected mouse lemurs (sub bipartite and tripartite networks are not shown) (see Supplementary Table S3 for more details). Blue nodes mark decreasing OTUs and red nodes increasing OTUs. Node sizes are according to the relative proportion of the OTUs. Red edges indicate negative relationships and grey edges positive relationships between the interacting OTUs. The highest possible taxonomic assignment (maximal to the genus level) is shown for each OTU. \*indicates unclassified OTUs at genus level.

**Supplementary Table S1:** Summary of the best model (GLM) predicting (a) observed species, (b) Chao1, and (c) phylogenetic diversity (PD) according to AdV, age and AdV\*age interaction. Significant p values (<0.05) are shown in bold.

| <b>Variables</b>            | <b>Estimate</b> | <b>Std.Error</b> | <b>t value</b> | <b>P</b>     |
|-----------------------------|-----------------|------------------|----------------|--------------|
| <b>(a) Observed species</b> |                 |                  |                |              |
| AdV                         | 15.500          | 43.500           | 0.356          | 0.722        |
| Age                         | -101.470        | 32.740           | -3.099         | <b>0.002</b> |
| AdV*age                     | 35.150          | 63.970           | 0.549          | 0.584        |
| <b>(b) Chao1</b>            |                 |                  |                |              |
| AdV                         | 63.580          | 86.750           | 0.733          | 0.465        |
| Age                         | -179.530        | 65.300           | -2.749         | <b>0.007</b> |
| AdV*age                     | 66.880          | 127.570          | 0.524          | 0.601        |
| <b>(c) PD</b>               |                 |                  |                |              |
| AdV                         | 0.317           | 2.089            | 0.152          | 0.880        |
| Age                         | -4.839          | 1.572            | -3.078         | <b>0.003</b> |
| AdV*age                     | 3.742           | 3.072            | 1.218          | 0.225        |



**Supplementary Table S2:** Summary of PERMANOVA models of (a) Unweighted UniFrac, (b) Weighted UniFrac and (c) Bray-Curtis metrics according to AdV infection, age and AdV\*age interaction. Significant p values ( $\leq 0.05$ ) are shown in bold.

| <b>Variables</b>              | <b>SumsOfSqs</b> | <b>MeanSqs</b> | <b>F.Model</b> | <b>R2</b> | <b>P</b>     |
|-------------------------------|------------------|----------------|----------------|-----------|--------------|
| <b>(a) Unweighted UniFrac</b> |                  |                |                |           |              |
| AdV                           | 0.292            | 0.292          | 1.455          | 0.010     | <b>0.016</b> |
| Age                           | 0.489            | 0.489          | 2.440          | 0.017     | <b>0.001</b> |
| AdV*age                       | 0.229            | 0.229          | 1.144          | 0.008     | 0.172        |
| Residuals                     | 28.454           | 0.200          |                | 0.966     |              |
| Total                         | 29.464           |                |                | 1.000     |              |
| <b>(b) Weighted UniFrac</b>   |                  |                |                |           |              |
| AdV                           | 0.125            | 0.125          | 1.955          | 0.013     | <b>0.055</b> |
| Age                           | 0.293            | 0.293          | 4.585          | 0.031     | <b>0.005</b> |
| AdV*age                       | 0.042            | 0.042          | 0.658          | 0.004     | 0.704        |
| Residuals                     | 9.085            | 0.064          |                | 0.952     |              |
| Total                         | 9.546            |                |                | 1.000     |              |
| <b>(c) Bray-Curtis</b>        |                  |                |                |           |              |
| AdV                           | 0.304            | 0.304          | 1.870          | 0.013     | <b>0.037</b> |
| Age                           | 0.707            | 0.707          | 4.343          | 0.029     | <b>0.001</b> |
| AdV*age                       | 0.188            | 0.188          | 1.154          | 0.008     | 0.282        |
| Residuals                     | 23.105           | 0.163          |                | 0.951     |              |
| Total                         | 24.304           |                |                | 1.000     |              |

**Supplementary Table S3:** Nomenclature and abundances of 78 OTUs identified by Exact tests in mouse lemurs as differing in their mean abundance in relation to their AdV infection status. Only highly significant OTUs (after FDR correction using Benjamini-Hochberg procedure (BH),  $\leq 0.01$ ) are shown and arranged according to increasing log2 fold change (log2FC) values. In the column log2FC, OTUs that showed a lower abundance (i.e. mean read coverage) in AdV+ lemurs are marked in blue (65.3%), those that increased in abundance in AdV+ lemurs are marked in red (34.6%). Indicated are also the fraction of samples (AdV-, AdV+) in which OTUs are present (in %) and the abundance (number of reads) of an OTU in both AdV- and AdV+ mouse lemurs. samples. Potential pathogenic genera are marked in red (see Fig. 3).

Page1

| OTU        | AdV- fraction (%) | AdV+ fraction (%) | AdV- reads | AdV+ reads | log2FC | PValue   | BH       |
|------------|-------------------|-------------------|------------|------------|--------|----------|----------|
| OTU450849  | 3.67              | 0                 | 4081       | 0          | -5,602 | 1,12E-11 | 2,11E-10 |
| OTU354254  | 2.75              | 2.7               | 3093       | 1          | -4,746 | 2,19E-10 | 3,25E-09 |
| OTU339457  | 1.83              | 2.7               | 1881       | 1          | -4,625 | 2,78E-10 | 3,85E-09 |
| OTU583656  | 13.76             | 13.51             | 2676       | 12         | -4,400 | 2,19E-10 | 3,25E-09 |
| OTU661055  | 2.75              | 0                 | 1362       | 0          | -4,181 | 9,77E-10 | 1,26E-08 |
| OTU264240  | 3.67              | 0                 | 1485       | 0          | -4,096 | 1,22E-09 | 1,41E-08 |
| OTU1106614 | 2.75              | 2.7               | 1289       | 1          | -3,950 | 2,15E-09 | 2,23E-08 |
| OTU564704  | 56.88             | 51.35             | 16981      | 292        | -3,861 | 5,22E-07 | 2,31E-06 |
| OTU452014  | 3.67              | 2.7               | 1124       | 1          | -3,828 | 3,52E-09 | 3,35E-08 |
| OTU276149  | 10.09             | 8.11              | 1467       | 3          | -3,819 | 1,52E-09 | 1,66E-08 |
| OTU692154  | 4.59              | 2.7               | 1442       | 1          | -3,801 | 3,55E-09 | 3,35E-08 |
| OTU178491  | 2.75              | 2.7               | 1387       | 1          | -3,603 | 1,07E-08 | 7,95E-08 |
| OTU4329450 | 2.75              | 0                 | 1035       | 0          | -3,546 | 9,16E-09 | 7,95E-08 |
| OTU444     | 2.75              | 0                 | 968        | 0          | -3,521 | 9,94E-09 | 7,95E-08 |
| OTU221454  | 4.59              | 0                 | 864        | 0          | -3,512 | 1,00E-08 | 7,95E-08 |
| OTU263     | 2.75              | 0                 | 909        | 0          | -3,508 | 9,26E-09 | 7,95E-08 |
| OTU356627  | 1.83              | 0                 | 934        | 0          | -3,462 | 1,39E-08 | 9,96E-08 |
| OTU647215  | 6.42              | 5.41              | 865        | 2          | -3,435 | 1,03E-08 | 7,95E-08 |
| OTU311173  | 1.83              | 2.7               | 776        | 1          | -3,402 | 2,21E-08 | 1,48E-07 |
| OTU535375  | 27.52             | 21.62             | 5445       | 153        | -3,372 | 9,27E-07 | 3,78E-06 |
| OTU604966  | 8.26              | 0                 | 931        | 0          | -3,321 | 1,62E-08 | 1,13E-07 |
| OTU592160  | 3.67              | 2.7               | 978        | 1          | -3,248 | 3,22E-08 | 2,03E-07 |
| OTU1107027 | 5.5               | 0                 | 923        | 0          | -3,221 | 2,71E-08 | 1,76E-07 |

**Page 2**

|            |       |       |       |       |        |             |             |
|------------|-------|-------|-------|-------|--------|-------------|-------------|
| OTU422     | 21.1  | 10.81 | 9406  | 480   | -3,146 | 1,32E-05    | 4,56E-05    |
| OTU356529  | 3.67  | 0     | 813   | 0     | -3,109 | 4,74E-08    | 2,90E-07    |
| OTU194225  | 2.75  | 0     | 593   | 0     | -3,017 | 9,06E-08    | 5,39E-07    |
| OTU1517779 | 3.67  | 0     | 576   | 0     | -2,969 | 9,71E-08    | 5,61E-07    |
| OTU116901  | 3.67  | 0     | 479   | 0     | -2,829 | 2,48E-07    | 1,25E-06    |
| OTU453896  | 3.67  | 0     | 568   | 0     | -2,817 | 1,77E-07    | 9,68E-07    |
| OTU119019  | 3.67  | 0     | 570   | 0     | -2,817 | 1,90E-07    | 1,01E-06    |
| OTU831409  | 3.67  | 0     | 471   | 0     | -2,791 | 2,53E-07    | 1,25E-06    |
| OTU671     | 22.94 | 45.95 | 3824  | 166   | -2,782 | 2,40E-05    | 8,19E-05    |
| OTU278912  | 2.75  | 0     | 506   | 0     | -2,767 | 2,41E-07    | 1,25E-06    |
| OTU208843  | 5.5   | 5.41  | 575   | 4     | -2,723 | 2,76E-07    | 1,33E-06    |
| OTU401384  | 3.67  | 2.7   | 439   | 1     | -2,659 | 4,86E-07    | 2,25E-06    |
| OTU356360  | 2.75  | 2.7   | 618   | 1     | -2,640 | 4,65E-07    | 2,20E-06    |
| OTU228061  | 10.09 | 8.11  | 1189  | 57    | -2,623 | 7,03E-06    | 2,61E-05    |
| OTU351979  | 22.94 | 13.51 | 8104  | 522   | -2,620 | 0,000338109 | 0,001049652 |
| OTU271101  | 1.83  | 0     | 394   | 0     | -2,588 | 8,15E-07    | 3,39E-06    |
| OTU953855  | 5.5   | 2.7   | 802   | 21    | -2,559 | 3,63E-06    | 1,37E-05    |
| OTU588197  | 4.59  | 0     | 486   | 0     | -2,553 | 6,50E-07    | 2,82E-06    |
| OTU1106101 | 2.75  | 2.7   | 478   | 1     | -2,367 | 1,55E-06    | 6,18E-06    |
| OTU359984  | 4.59  | 2.7   | 450   | 1     | -2,297 | 2,03E-06    | 7,95E-06    |
| OTU320915  | 4.59  | 8.11  | 668   | 15    | -2,256 | 9,86E-06    | 3,60E-05    |
| OTU1111294 | 62.39 | 72.97 | 2872  | 197   | -2,152 | 0,000110518 | 0,000364885 |
| OTU583117  | 22.02 | 21.62 | 5051  | 381   | -2,143 | 0,001063886 | 0,003073449 |
| OTU393     | 61.47 | 72.97 | 3792  | 330   | -1,961 | 0,00027432  | 0,000864523 |
| OTU4456606 | 24.77 | 32.43 | 1076  | 81    | -1,833 | 0,000237586 | 0,000760277 |
| OTU364179  | 11.01 | 8.11  | 1549  | 179   | -1,832 | 0,002542556 | 0,006868202 |
| OTU208479  | 10.09 | 5.41  | 583   | 46    | -1,537 | 0,00119764  | 0,003412454 |
| OTU228     | 99.08 | 97.3  | 15610 | 2637  | -1,207 | 0,000630084 | 0,001845879 |
| OTU317     | 99.08 | 100   | 8469  | 6087  | 1,001  | 0,00157424  | 0,004424892 |
| OTU132     | 80.73 | 94.59 | 17612 | 14122 | 1,180  | 0,002167545 | 0,005932229 |
| OTU591635  | 23.85 | 35.14 | 1260  | 1043  | 1,264  | 0,003188812 | 0,0085035   |
| OTU854050  | 23.85 | 32.43 | 575   | 596   | 1,498  | 0,00036854  | 0,00111096  |
| OTU426     | 37.61 | 51.35 | 4337  | 4462  | 1,518  | 0,001674689 | 0,00464447  |

**Page 3**

|            |       |       |       |       |       |             |             |
|------------|-------|-------|-------|-------|-------|-------------|-------------|
| OTU279048  | 42.2  | 70.27 | 7285  | 7003  | 1,707 | 0,000482455 | 0,001433581 |
| OTU3513545 | 22.02 | 29.73 | 2402  | 3110  | 1,836 | 0,000206611 | 0,000671486 |
| OTU1106254 | 3.67  | 8.11  | 706   | 1028  | 1,843 | 7,91E-05    | 0,00026552  |
| OTU325530  | 11.01 | 27.03 | 433   | 824   | 1,850 | 3,47E-06    | 1,34E-05    |
| OTU528421  | 20.18 | 13.51 | 829   | 1002  | 2,041 | 1,23E-05    | 4,40E-05    |
| OTU1084865 | 82.57 | 86.49 | 44690 | 75527 | 2,171 | 0,000357862 | 0,001094638 |
| OTU201     | 27.52 | 37.84 | 4320  | 7338  | 2,279 | 1,28E-05    | 4,50E-05    |
| OTU336708  | 21.1  | 35.14 | 1601  | 3168  | 2,387 | 7,71E-07    | 3,27E-06    |
| OTU66      | 53.21 | 56.76 | 3067  | 6369  | 2,538 | 1,14E-07    | 6,41E-07    |
| OTU179     | 21.1  | 37.84 | 2513  | 5476  | 2,557 | 4,99E-07    | 2,26E-06    |
| OTU1065569 | 47.71 | 40.54 | 505   | 1031  | 2,622 | 7,44E-11    | 1,29E-09    |
| OTU766563  | 13.76 | 27.03 | 191   | 508   | 2,666 | 2,34E-13    | 4,86E-12    |
| OTU938948  | 33.94 | 29.73 | 147   | 540   | 2,962 | 4,25E-18    | 1,26E-16    |
| OTU135     | 44.04 | 40.54 | 291   | 987   | 3,164 | 1,20E-17    | 2,78E-16    |
| OTU488     | 21.1  | 21.62 | 70    | 458   | 3,179 | 4,62E-21    | 1,60E-19    |
| OTU254021  | 24.77 | 40.54 | 3155  | 8156  | 3,248 | 1,03E-09    | 1,26E-08    |
| OTU818603  | 15.6  | 18.92 | 172   | 797   | 3,270 | 9,79E-18    | 2,55E-16    |
| OTU988314  | 21.1  | 24.32 | 109   | 739   | 3,618 | 6,32E-24    | 2,63E-22    |
| OTU1084417 | 40.37 | 37.84 | 194   | 1194  | 3,834 | 1,54E-24    | 8,01E-23    |
| OTU849156  | 8.26  | 13.51 | 15    | 525   | 3,876 | 3,20E-31    | 3,33E-29    |
| OTU1097359 | 9.17  | 13.51 | 96    | 1783  | 4,954 | 2,34E-35    | 4,87E-33    |
| OTU761024  | 49.54 | 56.76 | 513   | 5379  | 4,962 | 1,67E-29    | 1,16E-27    |

**Page1 continued**

| <b>Kingdom</b> | <b>Phylum</b>  | <b>Class</b>          | <b>Order</b>      | <b>Family</b>      | <b>Genus</b>    | <b>Species</b> |
|----------------|----------------|-----------------------|-------------------|--------------------|-----------------|----------------|
| Bacteria       | Bacteroidetes  | Bacteroidia           | Bacteroidales     | S24-7              | NA              | NA             |
| Bacteria       | Firmicutes     | Clostridia            | Clostridiales     | Lachnospiraceae    | Coprococcus     | NA             |
| Bacteria       | Bacteroidetes  | Bacteroidia           | Bacteroidales     | Prevotellaceae     | Prevotella      | copri          |
| Bacteria       | Bacteroidetes  | Bacteroidia           | Bacteroidales     | Bacteroidaceae     | Bacteroides     | NA             |
| Bacteria       | Firmicutes     | Clostridia            | Clostridiales     | NA                 | NA              | NA             |
| Bacteria       | Bacteroidetes  | Bacteroidia           | Bacteroidales     | Rikenellaceae      | NA              | NA             |
| Bacteria       | Firmicutes     | Clostridia            | Clostridiales     | NA                 | NA              | NA             |
| Bacteria       | Firmicutes     | Bacilli               | Lactobacillales   | Leuconostocaceae   | NA              | NA             |
| Bacteria       | Firmicutes     | Clostridia            | Clostridiales     | Ruminococcaceae    | Oscillospira    | NA             |
| Bacteria       | Bacteroidetes  | Bacteroidia           | Bacteroidales     | Porphyromonadaceae | Parabacteroides | NA             |
| Bacteria       | Firmicutes     | Bacilli               | Lactobacillales   | Lactobacillaceae   | Lactobacillus   | reuteri        |
| Bacteria       | Proteobacteria | Alphaproteobacteria   | RF32              | NA                 | NA              | NA             |
| Bacteria       | Firmicutes     | Clostridia            | Clostridiales     | Lachnospiraceae    | NA              | NA             |
| Bacteria       | Bacteroidetes  | Bacteroidia           | Bacteroidales     | S24-7              | NA              | NA             |
| Bacteria       | Firmicutes     | Clostridia            | Clostridiales     | Ruminococcaceae    | Ruminococcus    | NA             |
| Bacteria       | Bacteroidetes  | Bacteroidia           | Bacteroidales     | S24-7              | NA              | NA             |
| Bacteria       | Firmicutes     | Clostridia            | Clostridiales     | NA                 | NA              | NA             |
| Bacteria       | Firmicutes     | Clostridia            | Clostridiales     | Ruminococcaceae    | Oscillospira    | NA             |
| Bacteria       | Proteobacteria | Epsilonproteobacteria | Campylobacterales | Helicobacteraceae  | NA              | NA             |
| Bacteria       | Bacteroidetes  | Bacteroidia           | Bacteroidales     | Bacteroidaceae     | Bacteroides     | ovatus         |
| Bacteria       | Firmicutes     | Bacilli               | Lactobacillales   | Lactobacillaceae   | Lactobacillus   | NA             |
| Bacteria       | Firmicutes     | Bacilli               | Lactobacillales   | Lactobacillaceae   | Lactobacillus   | NA             |
| Bacteria       | Firmicutes     | Bacilli               | Lactobacillales   | Lactobacillaceae   | Lactobacillus   | NA             |

Page2 continued

|          |                |                     |                   |                      |                      |         |
|----------|----------------|---------------------|-------------------|----------------------|----------------------|---------|
| Bacteria | Bacteroidetes  | Bacteroidia         | Bacteroidales     | Prevotellaceae       | Prevotella           | NA      |
| Bacteria | Firmicutes     | Bacilli             | Lactobacillales   | Lactobacillaceae     | Lactobacillus        | NA      |
| Bacteria | Bacteroidetes  | Bacteroidia         | Bacteroidales     | S24-7                | NA                   | NA      |
| Bacteria | Bacteroidetes  | Bacteroidia         | Bacteroidales     | Rikenellaceae        | NA                   | NA      |
| Bacteria | Bacteroidetes  | Bacteroidia         | Bacteroidales     | [Odoribacteraceae]   | Odoribacter          | NA      |
| Bacteria | Bacteroidetes  | Bacteroidia         | Bacteroidales     | S24-7                | NA                   | NA      |
| Bacteria | Bacteroidetes  | Bacteroidia         | Bacteroidales     | S24-7                | NA                   | NA      |
| Bacteria | Firmicutes     | Clostridia          | Clostridiales     | NA                   | NA                   | NA      |
| Bacteria | Tenericutes    | Mollicutes          | Mycoplasmatales   | Mycoplasmataceae     | NA                   | NA      |
| Bacteria | Bacteroidetes  | Bacteroidia         | Bacteroidales     | S24-7                | NA                   | NA      |
| Bacteria | Bacteroidetes  | Bacteroidia         | Bacteroidales     | [Odoribacteraceae]   | Odoribacter          | NA      |
| Bacteria | Firmicutes     | Clostridia          | Clostridiales     | Ruminococcaceae      | Oscillospira         | NA      |
| Bacteria | Firmicutes     | Clostridia          | Clostridiales     | NA                   | NA                   | NA      |
| Bacteria | Firmicutes     | Clostridia          | Clostridiales     | Ruminococcaceae      | NA                   | NA      |
| Bacteria | Fusobacteria   | Fusobacteriia       | Fusobacteriales   | Fusobacteriaceae     | <b>Fusobacterium</b> | NA      |
| Bacteria | Bacteroidetes  | Bacteroidia         | Bacteroidales     | S24-7                | NA                   | NA      |
| Bacteria | Bacteroidetes  | Bacteroidia         | Bacteroidales     | Rikenellaceae        | NA                   | NA      |
| Bacteria | Firmicutes     | Bacilli             | Lactobacillales   | Lactobacillaceae     | Lactobacillus        | reuteri |
| Bacteria | Bacteroidetes  | Bacteroidia         | Bacteroidales     | S24-7                | NA                   | NA      |
| Bacteria | Firmicutes     | Clostridia          | Clostridiales     | Ruminococcaceae      | NA                   | NA      |
| Bacteria | Cyanobacteria  | 4C0d-2              | YS2               | NA                   | NA                   | NA      |
| Bacteria | Proteobacteria | Gammaproteobacteria | Enterobacteriales | Enterobacteriaceae   | NA                   | NA      |
| Bacteria | Bacteroidetes  | Bacteroidia         | Bacteroidales     | Bacteroidaceae       | Bacteroides          | ovatus  |
| Bacteria | Proteobacteria | Gammaproteobacteria | Pasteurellales    | Pasteurellaceae      | <b>Haemophilus</b>   | NA      |
| Bacteria | Cyanobacteria  | 4C0d-2              | YS2               | NA                   | NA                   | NA      |
| Bacteria | Bacteroidetes  | Bacteroidia         | Bacteroidales     | Bacteroidaceae       | Bacteroides          | NA      |
| Bacteria | Bacteroidetes  | Bacteroidia         | Bacteroidales     | [Odoribacteraceae]   | Butyricimonas        | NA      |
| Bacteria | Actinobacteria | Coriobacteriia      | Coriobacteriales  | Coriobacteriaceae    | NA                   | NA      |
| Bacteria | Actinobacteria | Coriobacteriia      | Coriobacteriales  | Coriobacteriaceae    | <b>Collinsella</b>   | NA      |
| Bacteria | Bacteroidetes  | Bacteroidia         | Bacteroidales     | [Paraprevotellaceae] | [Prevotella]         | NA      |
| Bacteria | Firmicutes     | Clostridia          | Clostridiales     | Ruminococcaceae      | Ruminococcus         | NA      |
| Bacteria | Firmicutes     | Bacilli             | Bacillales        | Planococcaceae       | NA                   | NA      |
| Bacteria | Bacteroidetes  | Bacteroidia         | Bacteroidales     | Prevotellaceae       | Prevotella           | NA      |

Page3 continued

|          |                |                     |                    |                      |                |    |
|----------|----------------|---------------------|--------------------|----------------------|----------------|----|
| Bacteria | Cyanobacteria  | 4C0d-2              | YS2                | NA                   | NA             | NA |
| Bacteria | Firmicutes     | Bacilli             | Lactobacillales    | Leuconostocaceae     | Fructobacillus | NA |
| Bacteria | Bacteroidetes  | Bacteroidia         | Bacteroidales      | [Paraprevotellaceae] | Paraprevotella | NA |
| Bacteria | Firmicutes     | Erysipelotrichi     | Erysipelotrichales | Erysipelotrichaceae  | RFN20          | NA |
| Bacteria | Proteobacteria | Gammaproteobacteria | Enterobacteriales  | Enterobacteriaceae   | Citrobacter    | NA |
| Bacteria | Firmicutes     | Bacilli             | Bacillales         | NA                   | NA             | NA |
| Bacteria | Bacteroidetes  | Bacteroidia         | Bacteroidales      | Bacteroidaceae       | Bacteroides    | NA |
| Bacteria | Firmicutes     | Clostridia          | Clostridiales      | Lachnospiraceae      | NA             | NA |
| Bacteria | Firmicutes     | Erysipelotrichi     | Erysipelotrichales | Erysipelotrichaceae  | [Eubacterium]  | NA |
| Bacteria | Firmicutes     | Clostridia          | Clostridiales      | Lachnospiraceae      | NA             | NA |
| Bacteria | Firmicutes     | Bacilli             | Lactobacillales    | NA                   | NA             | NA |
| Bacteria | Firmicutes     | Bacilli             | Lactobacillales    | Leuconostocaceae     | Leuconostoc    | NA |
| Bacteria | Fusobacteria   | Fusobacteriia       | Fusobacteriales    | Fusobacteriaceae     | Fusobacterium  | NA |
| Bacteria | Firmicutes     | Bacilli             | Lactobacillales    | NA                   | NA             | NA |
| Bacteria | Proteobacteria | Betaproteobacteria  | Neisseriales       | Neisseriaceae        | Neisseria      | NA |
| Bacteria | Firmicutes     | Bacilli             | Lactobacillales    | Leuconostocaceae     | Leuconostoc    | NA |
| Bacteria | Firmicutes     | Bacilli             | Bacillales         | Bacillaceae          | NA             | NA |
| Bacteria | Proteobacteria | Gammaproteobacteria | Pseudomonadales    | Moraxellaceae        | Acinetobacter  | NA |
| Bacteria | Proteobacteria | Betaproteobacteria  | Burkholderiales    | Burkholderiaceae     | Lautropia      | NA |
| Bacteria | Proteobacteria | Betaproteobacteria  | Burkholderiales    | Oxalobacteraceae     | NA             | NA |
| Bacteria | Proteobacteria | Gammaproteobacteria | Pseudomonadales    | Moraxellaceae        | Acinetobacter  | NA |
| Bacteria | Proteobacteria | Betaproteobacteria  | Neisseriales       | Neisseriaceae        | Neisseria      | NA |

**Supplementary Table S4:** Viral load information of AdV positive samples based on real-time PCRs.

| SID | AdV status | DNA cp/μl | DNA copies/ml StoolSuspension | Log10 DNA copies/ml StoolSuspension | group (virus load) |
|-----|------------|-----------|-------------------------------|-------------------------------------|--------------------|
| 58  | pos        | 5         | 60000                         | 4.78                                | low                |
| 59  | pos        | 5         | 60000                         | 4.78                                | low                |
| 61  | pos        | 56.5      | 678000                        | 5.83                                | low                |
| 63  | pos        | 72.2      | 866400                        | 5.94                                | low                |
| 70  | pos        | 35.3      | 423600                        | 5.63                                | low                |
| 72  | pos        | 26.6      | 319200                        | 5.50                                | low                |
| 73  | pos        | 5         | 60000                         | 4.78                                | low                |
| 76  | pos        | 1330      | 15960000                      | 7.20                                | intermediate       |
| 80  | pos        | 58.9      | 706800                        | 5.85                                | low                |
| 180 | pos        | 10300     | 123600000                     | 8.09                                | high               |
| 192 | pos        | 380       | 4560000                       | 6.66                                | intermediate       |
| 395 | pos        | 2030      | 24360000                      | 7.39                                | intermediate       |
| 400 | pos        | 246000    | 2952000000                    | 9.47                                | high               |
| 405 | pos        | 5         | 60000                         | 4.78                                | low                |
| 408 | pos        | 603       | 7236000                       | 6.86                                | intermediate       |
| 438 | pos        | 255       | 3060000                       | 6.49                                | intermediate       |
| 444 | pos        | 5         | 60000                         | 4.78                                | low                |
| 446 | pos        | 215000    | 2580000000                    | 9.41                                | high               |
| 447 | pos        | 241       | 2892000                       | 6.46                                | intermediate       |
| 449 | pos        | 5         | 60000                         | 4.78                                | low                |
| 451 | pos        | 5         | 60000                         | 4.78                                | low                |
| 466 | pos        | 5         | 60000                         | 4.78                                | low                |
| 481 | pos        | 5         | 60000                         | 4.78                                | low                |
| 603 | pos        | 62.9      | 754800                        | 5.88                                | low                |
| 605 | pos        | 20200     | 242400000                     | 8.38                                | high               |
| 606 | pos        | 4490000   | 53880000000                   | 10.73                               | high               |
| 607 | pos        | 40.9      | 490800                        | 5.69                                | low                |
| 608 | pos        | 130       | 1560000                       | 6.19                                | intermediate       |
| 610 | pos        | 10        | 120000                        | 5.08                                | low                |
| 613 | pos        | 311       | 3732000                       | 6.57                                | intermediate       |
| 616 | pos        | 64.6      | 775200                        | 5.89                                | low                |
| 617 | pos        | 16100     | 193200000                     | 8.29                                | high               |



page2

|     |     |         |             |       |              |
|-----|-----|---------|-------------|-------|--------------|
| 620 | pos | 1600    | 19200000    | 7.28  | intermediate |
| 622 | pos | 347     | 4164000     | 6.62  | intermediate |
| 625 | pos | 18.1    | 217200      | 5.34  | low          |
| 626 | pos | 83.2    | 998400      | 6.00  | intermediate |
| 641 | pos | 1100    | 13200000    | 7.12  | intermediate |
| 642 | pos | 45.5    | 546000      | 5.74  | low          |
| 646 | pos | 1780000 | 21360000000 | 10.33 | high         |
| 647 | pos | 5       | 60000       | 4.78  | low          |
| 649 | pos | 5       | 60000       | 4.78  | low          |
| 653 | pos | 39.7    | 476400      | 5.68  | low          |
| 664 | pos | 15.3    | 183600      | 5.26  | low          |
| 668 | pos | 1050000 | 12600000000 | 10.10 | high         |
